# Supplementary material
Source: PubMed Central journal article supplement (PMC7507706)
Supplement: EMBJ-39-e106275-s001.pdf [file EMBJ-39-e106275-s001.pdf]

# Appendix for Mechanism and inhibition of the papain-like protease, PLpro, of SARS-CoV-2

Theresa Klemm, Gregor Ebert, Dale J. Calleja, Cody C. Allison, Lachlan W. Richardson, Jonathan P. Bernardini, Bernadine G. C. Lu, Nathan W. Kuchel, Christoph Grohmann, Yuri Shibata, Zhong Yan Gan, James P. Cooney, Marcel Doerflinger, Amanda E. Au, Timothy R. Blackmore, Gerbrand J. van der Heden van Noort, Paul P. Geurink, Huib Ovaa<sup>#</sup>, Janet Newman, Alan Riboldi-Tunncliffe, Peter E. Czabotar, Jeffrey P. Mitchell, Rebecca Feltham, Bernhard C. Lechtenberg, Kym N. Lowes, Grant Dewson, Marc Pellegrini<sup>\*</sup>, Guillaume Lessene<sup>\*</sup> and David Komander<sup>\*</sup>

<sup>#</sup> deceased

<sup>\*</sup> Correspondence to David Komander, [dk@wehi.edu.au](mailto:dk@wehi.edu.au) ; Guillaume Lessene, [glessene@wehi.edu.au](mailto:glessene@wehi.edu.au) ; Marc Pellegrini, [pellegrini@wehi.edu.au](mailto:pellegrini@wehi.edu.au)

## Table of Contents:

|                                                                                 |            |
|---------------------------------------------------------------------------------|------------|
| <b>Appendix Figure S1</b> – Gel-based kinetics and catalytic efficiency         | pages 2-3  |
| <b>Appendix Figure S2</b> – Electron density for PLpro complexes                | pages 4-5  |
| <b>Appendix Table S1</b> – High throughput screening table                      | page 6     |
| <b>Appendix Supplementary Methods</b> – Compound synthesis and characterisation | pages 7-11 |
| <b>Appendix References</b>                                                      | page 12    |

**A**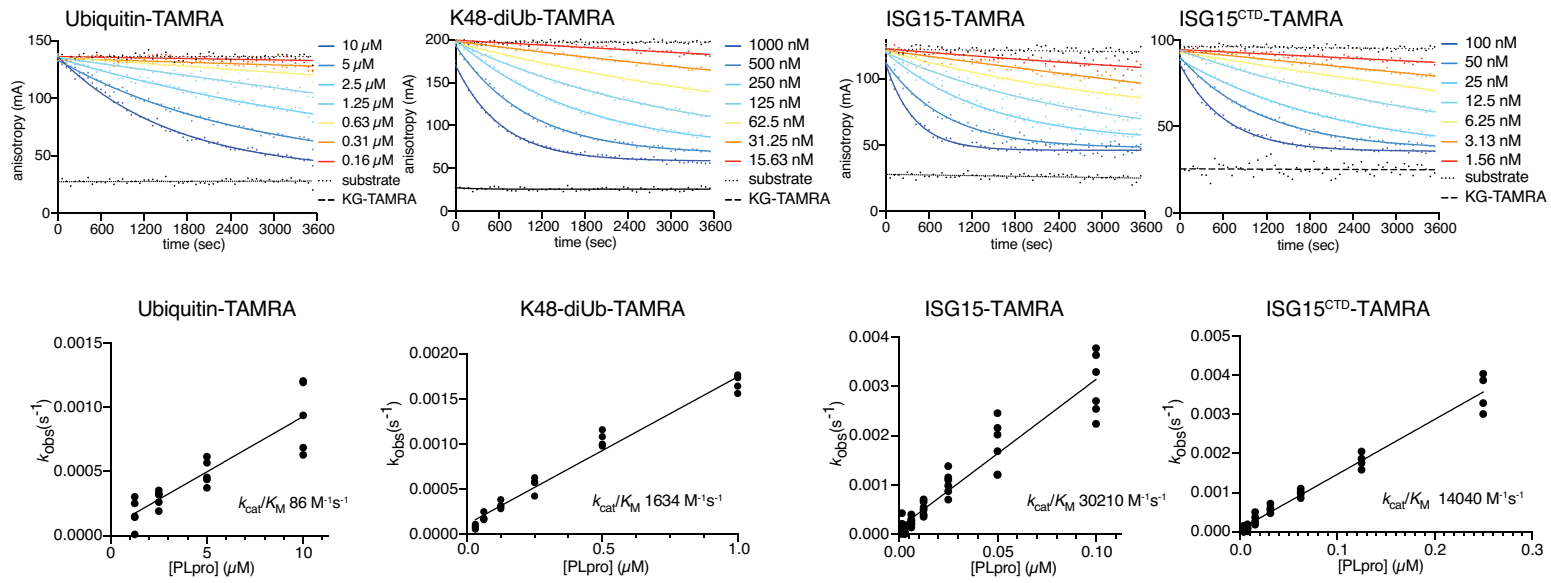**B**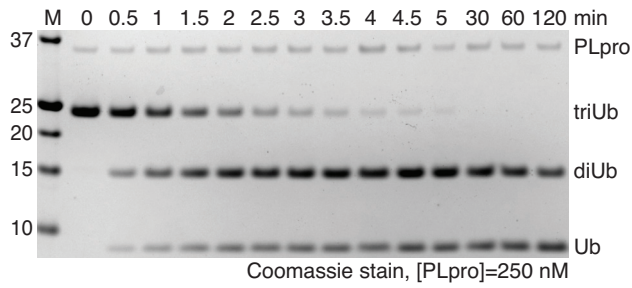**C**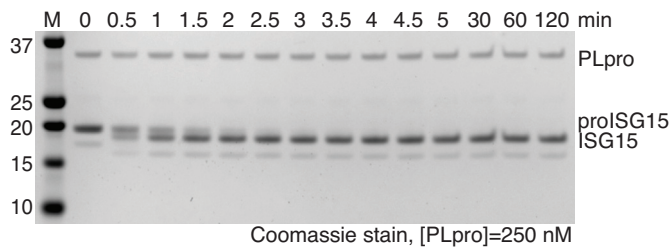**D**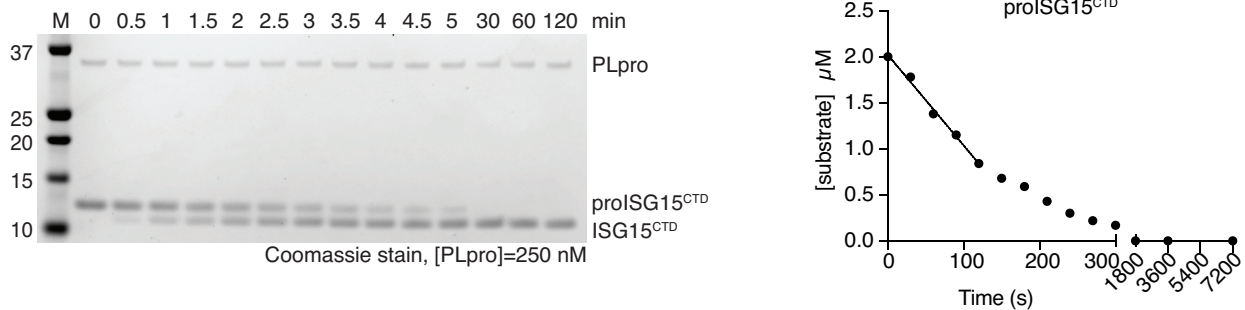

## Appendix Figure S1 – Gel-based kinetics and catalytic efficiency.

**A)** Raw data plots (*top*, one experiment shown) was used to calculate catalytic efficiency ( $k_{\text{cat}}/K_M$ ) (*bottom*). Experiments were performed in technical triplicate and  $n=5$  (Ub-TAMRA),  $n=6$  (ISG15-TAMRA),  $n=4$  (ISG15<sup>CTD</sup>-TAMRA, K48-diUb-TAMRA) biological replicates. See **Methods** for further details.

**B)** In order to quantify SARS2 PLpro activity in an alternative way, triubiquitin cleavage was followed over a time course, resolved on Coomassie-stained SDS-PAGE gels. The disappearance of triubiquitin was quantified by densitometry, plotted to the right. The linear part of the data, corresponding to an estimated observed catalytic rate ( $k_{\text{obs}}$ ), is indicated by a line.

**C, D)** For direct comparison, hydrolysis of extended 'pro'-forms of human ISG15, in which the modifier is extended by 8 residues on the C-terminus, to the mature form sporting a free Gly156-Gly157 C-terminus, was analysed as in **B**, as previously described (Swatek *et al*, 2018). The loss of 8 residues can be visualised as a small shift in size by SDS-PAGE.

Disappearance of the higher molecular weight band was quantified by densitometry and plotted on the right. The linear part of the curve was used to visually indicate  $k_{\text{obs}}$ .

Experiments were performed in duplicate.

Since identical enzyme concentrations (250 nM) were used in this assay,  $k_{\text{obs}}$  is comparable between experiments in **B-D**; however, the difference between cleaving a triubiquitin with an isopeptide linkage and an S1'-ubiquitin moiety, and cleaving a linear peptide off the C-terminus of ISG15, may lead to differences in PLpro activity.

**A** SARS-CoV-2 PLpro~Ub  
(2.7Å, 2|Fo|-|Fc| at 1σ, 1 complex per AU)

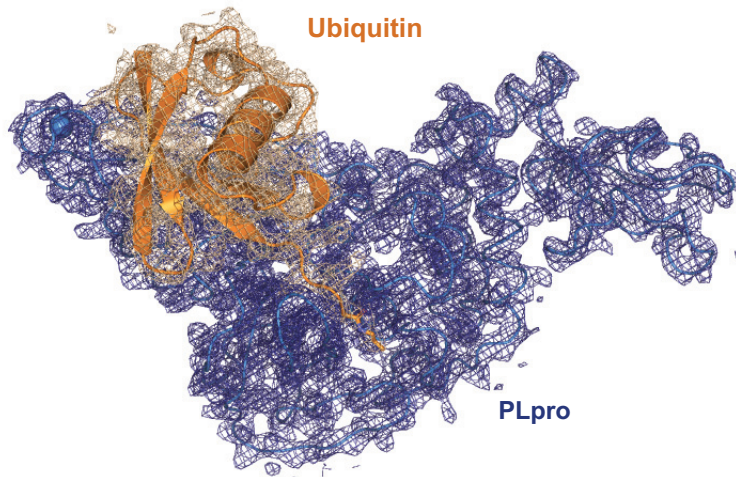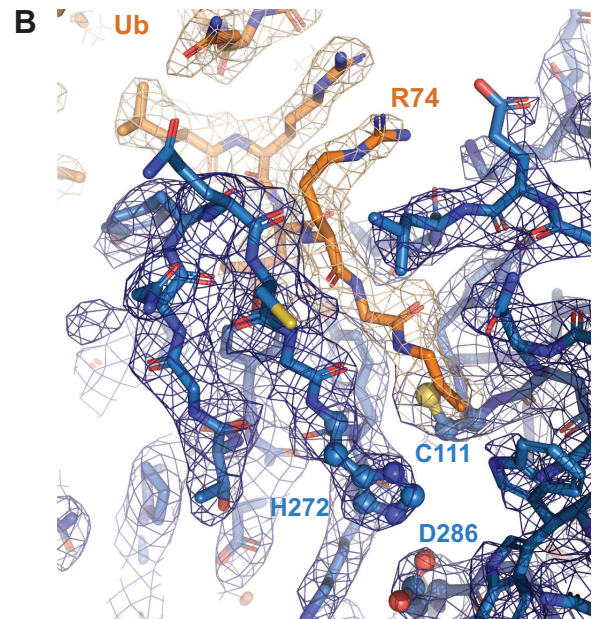

**C** SARS-CoV-2 PLpro~ISG15<sup>CTD</sup>  
(2.9 Å, 2|Fo|-|Fc| at 1σ, 3 complexes per AU)

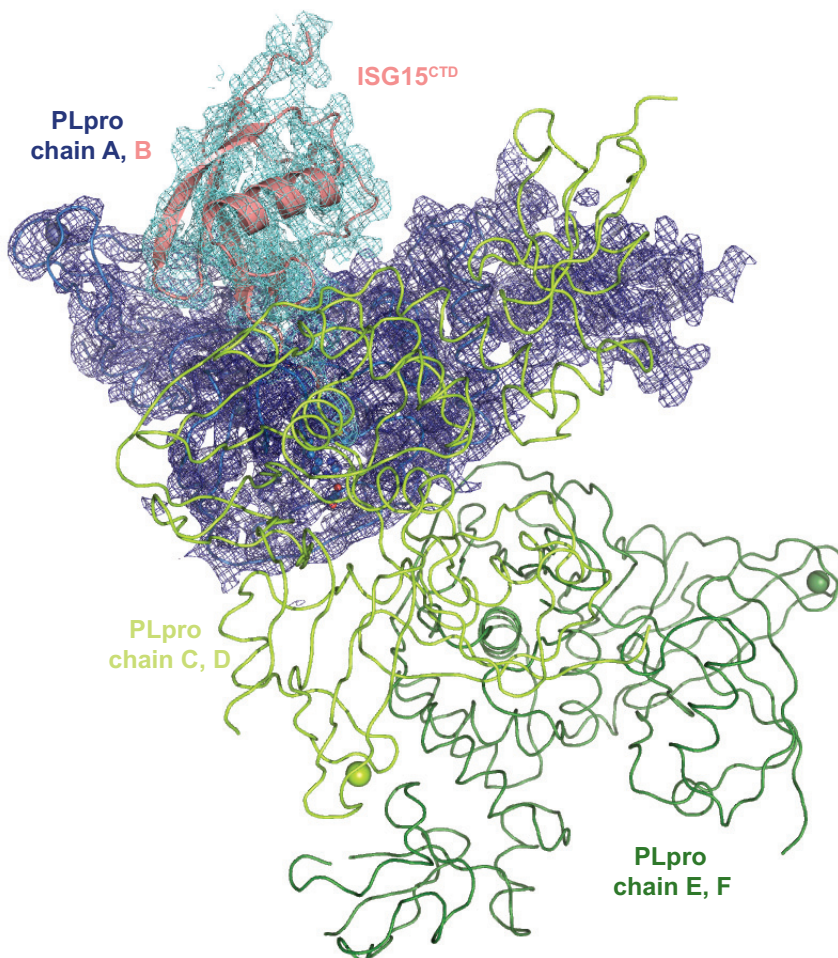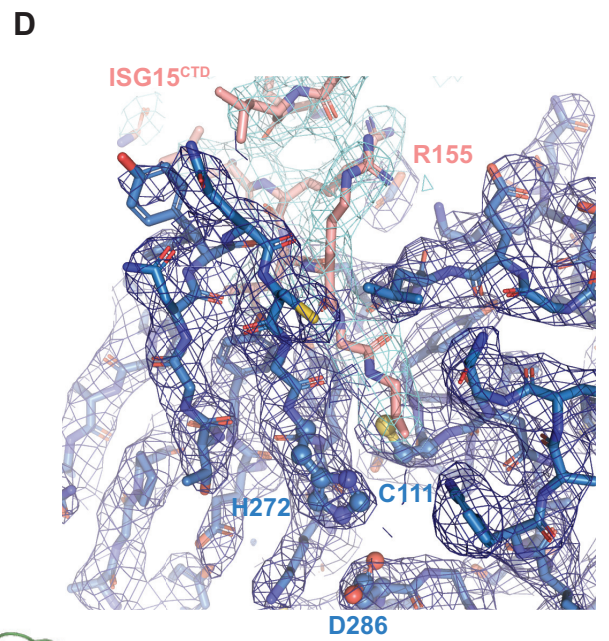

## **Appendix Figure S2. Electron density for PLpro complexes**

**A)**  $2|F_o| - |F_c|$  electron density, contoured at  $1\sigma$ , for the SARS2 PLpro~Ub complex. The full asymmetric unit is shown. SARS2 PLpro is shown as a ribbon, and ubiquitin is shown in cartoon representation.

**B)** Detailed electron density for the ubiquitin C-terminal tail in the active site, with the propargyl linked to catalytic Cys111.

**C)**  $2|F_o| - |F_c|$  electron density, contoured at  $1\sigma$ , for the SARS2 PLpro~ISG15<sup>CTD</sup> complex covering chain A (PLpro, ribbon) and B (ISG15<sup>CTD</sup>, cartoon). The remainder (chains C-F) of the asymmetric unit are shown as a ribbon without map.

**D)** Detailed electron density for the ISG15 C-terminal tail in the active site, with the propargyl-linked to catalytic Cys111.

**Appendix Table S1. High Throughput Screening Table.**

| <b>Category</b>   | <b>Parameter</b>                         | <b>Description</b>                                                                             |
|-------------------|------------------------------------------|------------------------------------------------------------------------------------------------|
| Assay             | Type of assay                            | Enzymatic, endpoint                                                                            |
|                   | Target                                   | SARS-CoV-2 Papain-like Protease                                                                |
|                   | Primary measurement                      | Fluorescence intensity                                                                         |
|                   | Key reagents                             | Ub-Rhodamine                                                                                   |
| Library           | Library size                             | 5,576 compounds                                                                                |
|                   | Library composition                      | Small molecule, including FDA-approved drugs, advanced preclinical compounds and focused sets. |
|                   | Source                                   | Commercial and in-house curated collections (see Methods)                                      |
| Screen            | Format                                   | 1536 well plate                                                                                |
|                   | Concentration tested                     | 4.2 $\mu$ M in 2% DMSO                                                                         |
|                   | Plate controls                           | Negative control; 2% DMSO, positive control; compound rac5c (see manuscript, Figure 5)         |
|                   | Reagent/ compound dispensing system      | See Methods                                                                                    |
|                   | Detection instrument and software        | PHERAstAr FSX (BMG)                                                                            |
|                   | Assay validation/QC                      | Robust $Z' > 0.5$                                                                              |
|                   | Hit criteria                             | $>4 * MAD$ above negative control                                                              |
|                   | Hit rate                                 | 0.45%                                                                                          |
| Post-HTS analysis | Counter screen                           | Human USP21, Ub-Rhodamine                                                                      |
|                   | Additional assay(s)                      |                                                                                                |
|                   | Confirmation of hit purity and structure | LC/MS                                                                                          |

## Appendix Supplementary Methods - Compound synthesis and characterisation

### General chemistry

Anhydrous solvents were obtained commercially (SIGMA-ALDRICH, Missouri, USA) and used without further purification. All other commercial reagents were used as supplied. All non-aqueous reactions were performed in oven-dried glassware under inert atmosphere (nitrogen gas), unless otherwise specified. Analytical thin-layer chromatography was performed on silica gel 60F<sub>254</sub> aluminium-backed plates (MERCK MILLIPORE) and were visualised by fluorescence quenching under UV light or by KMnO<sub>4</sub> staining. Chromatography was performed with silica gel 60 (particle size 0.040 – 0.063 μm) using an automated purification system (ISCO TELEDYNE). NMR spectra were recorded on a Bruker Ascend-300 300 MHz at 298 K unless otherwise specified. Chemical shifts are reported in ppm on the δ scale and referenced to the appropriate solvent peak. DMSO-d<sub>6</sub>, CD<sub>3</sub>OD and CDCl<sub>3</sub> contain H<sub>2</sub>O (*J* refers to coupling constant; s: singlet, d: doublet, t: triplet, q: quadruplet, m: multiplet, dq: doublet of quadruplets). HRMS analyses were carried out at the Monash University Mass Spectrometry Facility on an Agilent 6224 TOF LC/MS Mass Spectrometer coupled to an Agilent 1290 Infinity (Agilent, Palo Alto, CA). All data were acquired, and reference mass corrected via a dual-spray electrospray ionisation (ESI) source. LCMS were recorded on an Agilent LCMS system composed of an Agilent G6120B Mass Detector, 1260 Infinity G1312B Binary pump, 1260 Infinity G1367E HiPALS autosampler and 1260 Infinity G4212B Diode Array Detector. Conditions for LCMS were as follows, (Method A) column: Poroshell 120 EC-C18, 2.1 x 50 mm 2.7 Micron at 20 °C, injection volume 2 μL, gradient: 5–100% B over 3 min (solvent A: water 0.1% formic acid; solvent B: acetonitrile 0.1% formic acid), flow rate: 0.8 mL/min, detection: 254 nm, acquisition time: 5 min. HPLC conditions used to assess purity of final compounds were as follows, column: Phenomenex Gemini C18, 2.0 x 50 mm; injection volume 20 μL; gradient: 0–100% Buffer B over 6 min (buffer A: 0.1% formic acid in autoclaved MilliQ water; buffer B: 0.1% formic acid in 100% acetonitrile), flow rate: 1.0 mL/min, detection: 214 or 224 nm.

### Experimental – Racemic compounds

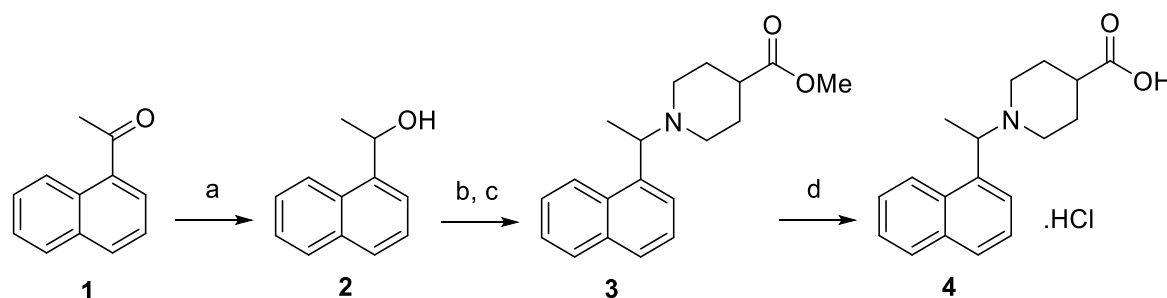

#### Step (a)

To a 0 °C solution of 1'-acetonaphthone (1.1 g, 6.5 mmol) in EtOH (20 mL) was added NaBH<sub>4</sub> (286 mg, 7.6 mmol) in one portion. The cooling bath was removed, and the reaction stirred until complete by LCMS. The reaction was concentrated under reduced pressure and the

crude partitioned between saturated aqueous  $\text{NH}_4\text{Cl}$  and EtOAc. The layers were separated and the aqueous further extracted with EtOAc. The combined organics were dried over anhydrous  $\text{MgSO}_4$ , filtered and concentrated under reduced pressure. The crude residue was subject to purification by combi-flash chromatography (0-40% EtOAc/n-heptane) to give 1-(naphthalen-1-yl)ethanol as a white solid (1.1 g, 98%).

$^1\text{H}$  NMR (300 MHz,  $\text{CDCl}_3$ )  $\delta$  8.17 – 8.08 (m, 1H), 7.94 – 7.82 (m, 1H), 7.79 (dq,  $J = 8.2, 0.8$  Hz, 1H), 7.69 (dt,  $J = 7.2, 1.0$  Hz, 1H), 7.59 – 7.43 (m, 3H), 5.69 (q,  $J = 6.7$  Hz, 1H), 1.98 (s, 1H), 1.68 (d,  $J = 6.4, 0.4$  Hz, 3H).

### Steps (b, c)

To a 0 °C solution of 1-(naphthalen-1-yl)ethanol (1.1 g, 6.4 mmol) in dry  $\text{CH}_2\text{Cl}_2$  (20 mL) was added  $\text{SOCl}_2$  (500  $\mu\text{L}$ , 6.9 mmol) drop wise followed by catalytic DMF (1 drop). The reaction was stirred until complete by TLC. The reaction mixture was quenched with saturated aqueous  $\text{NH}_4\text{Cl}$  and extracted with  $\text{CH}_2\text{Cl}_2$ . The combined organics were dried over anhydrous  $\text{MgSO}_4$ , filtered and concentrated under reduced pressure to give the desired alkyl chloride without any further purification. The crude alkyl chloride was taken up in dry MeCN (10 mL) and sequentially was added  $\text{K}_2\text{CO}_3$  (1.5 g, 10.8 mmol) and methyl isonipectoate (960  $\mu\text{L}$ , 7.1 mmol). The reaction was stirred at 70 °C until complete by LCMS. The reaction was concentrated under reduced pressure and the crude residue partitioned between saturated aqueous  $\text{NH}_4\text{Cl}$  and EtOAc. The layers were separated and the aqueous further extracted with EtOAc. The combined organics were dried over anhydrous  $\text{MgSO}_4$ , filtered and concentrated under reduced pressure. The crude residue was subject to purification by combi-flash chromatography (0-25% EtOAc/ $\text{CH}_2\text{Cl}_2$ ) to give methyl 1-(1-(naphthalen-1-yl)ethyl)piperidine-4-carboxylate as a yellow oil (574 mg, 37%).

$^1\text{H}$  NMR (300 MHz,  $\text{CDCl}_3$ )  $\delta$  8.48 – 8.39 (m, 1H), 7.90 – 7.79 (m, 1H), 7.74 (d,  $J = 8.0$  Hz, 1H), 7.57 (d,  $J = 7.1$  Hz, 1H), 7.54 – 7.37 (m, 3H), 4.10 (q,  $J = 6.7$  Hz, 1H), 3.66 (s, 3H), 3.19 – 3.09 (m, 1H), 2.87 – 2.78 (m, 1H), 2.37 – 2.21 (m, 1H), 2.16 – 1.98 (m, 2H), 1.97 – 1.87 (m, 1H), 1.85 – 1.66 (m, 3H), 1.46 (d,  $J = 6.7$  Hz, 3H).

### Step (d)

To a stirred solution of methyl 1-(1-(naphthalen-1-yl)ethyl)piperidine-4-carboxylate (564 mg, 1.9 mmol) in THF/MeOH (3:2) was added 40% aqueous NaOH (1 mL). The reaction was warmed at 60 °C until complete by LCMS. The reaction was concentrated under reduced pressure and the pH adjusted to 2 with 5N HCl. The precipitated solids were collected by filtration, washed with chilled  $\text{H}_2\text{O}$  and dried to give 1-(1-(naphthalen-1-yl)ethyl)piperidine-4-carboxylic acid hydrochloride as a white solid (552 mg, 91%).

$^1\text{H}$  NMR (300 MHz,  $\text{CD}_3\text{OD}$ )  $\delta$  8.30 (d,  $J = 8.6$  Hz, 1H), 8.08 – 7.96 (m, 2H), 7.91 – 7.83 (m, 1H), 7.75 – 7.55 (m, 3H), 5.44 (d,  $J = 6.4$  Hz, 1H), 4.03 (s, 1H), 3.29 – 3.09 (m, 2H), 2.98 (s, 1H), 2.59 (s, 1H), 2.43 – 1.62 (m, 8H).



### N-(3-fluorobenzyl)-1-(1-(naphthalen-1-yl)ethyl)piperidine-4-carboxamide (rac3k)

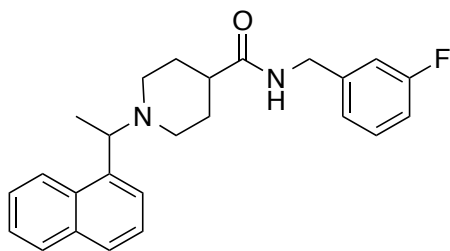

**rac3k**

To a solution of **4** (54 mg, 0.17 mmol) in dry DMF was added sequentially DIEA (62 mL, 0.36 mmol), ((3-fluorophenyl)methanamine (21 mL, 0.18 mmol) and HATU (71 mg, 0.19 mmol). The reaction was stirred at ambient temperature until complete by LCMS. The reaction was diluted with saturated aqueous NaHCO<sub>3</sub> and extracted with EtOAc. The combined extracts were washed with H<sub>2</sub>O (x3) and brine, dried over anhydrous MgSO<sub>4</sub>, filtered and concentrated under reduced pressure. The crude residue was subject to purification by combi-flash chromatography (0-5% MeOH/CH<sub>2</sub>Cl<sub>2</sub>) to give the title compound (59 mg, 90%). <sup>1</sup>H NMR (300 MHz, CDCl<sub>3</sub>) δ 8.48 – 8.39 (m, 1H), 7.90 – 7.79 (m, 1H), 7.74 (d, *J* = 8.1 Hz, 1H), 7.56 (d, *J* = 7.1 Hz, 1H), 7.53 – 7.37 (m, 3H), 7.34 – 7.21 (m, 1H), 7.06 – 6.89 (m, 1H), 5.76 (s, 1H), 4.43 (d, *J* = 5.8 Hz, 2H), 4.11 (q, 1H), 3.24 (d, *J* = 11.3 Hz, 1H), 2.90 (d, *J* = 11.5 Hz, 1H), 2.26 – 1.65 (m, 7H), 1.47 (d, *J* = 6.7 Hz, 3H). ES+ MS: (M + H) 391.2. HPLC *t*<sub>g</sub> = 1.5 min, >95% purity.

### NMR spectra of rac3k

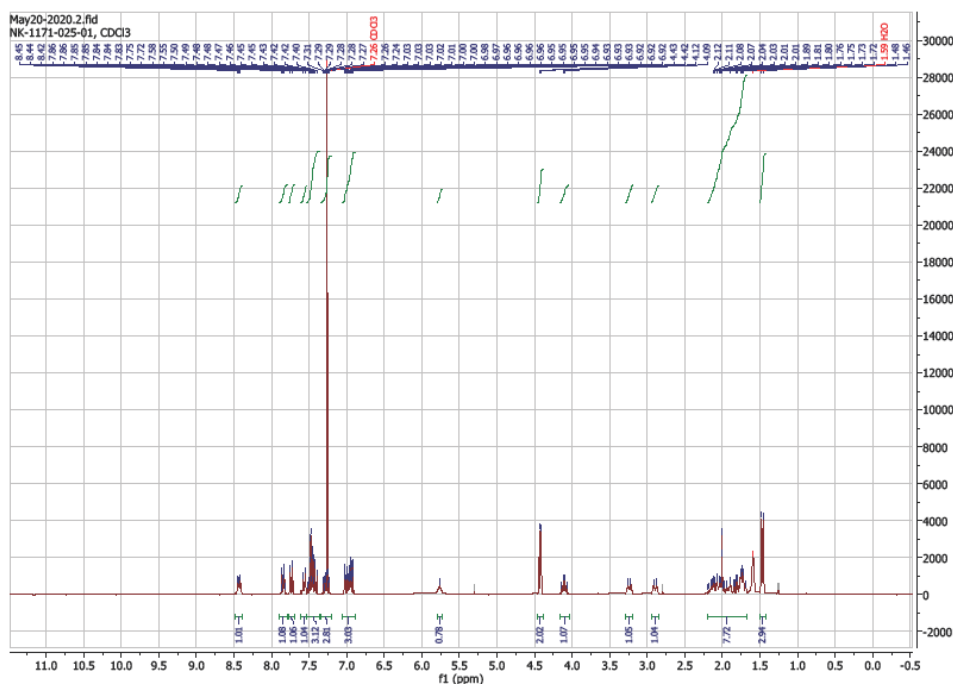

## N-(4-fluorobenzyl)-1-(1-(naphthalen-1-yl)ethyl)piperidine-4-carboxamide (rac3j)

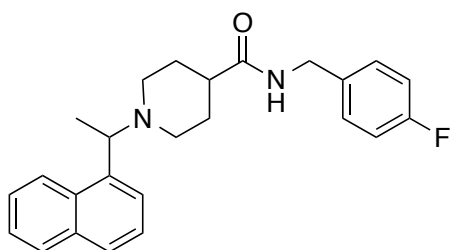

rac3j

The title compound **rac3j** was obtained as described for compound **rac3k** in 84% yield.  $^1\text{H}$  NMR (300 MHz,  $\text{CDCl}_3$ )  $\delta$  8.42 (d,  $J = 7.8$  Hz, 1H), 7.89 – 7.79 (m, 1H), 7.74 (d,  $J = 8.1$  Hz, 1H), 7.56 (d,  $J = 7.1$  Hz, 1H), 7.52 – 7.37 (m, 3H), 7.27 – 7.15 (m, 2H), 7.06 – 6.93 (m, 2H), 5.72 (s, 1H), 4.43 – 4.35 (m, 2H), 4.14 – 4.04 (m, 1H), 3.23 (d,  $J = 11.1$  Hz, 1H), 2.89 (d,  $J = 11.4$  Hz, 1H), 2.21 – 1.65 (m, 7H), 1.46 (d,  $J = 6.7$  Hz, 3H). ES+ MS: (M + H) 391.2. HPLC  $t_g = 1.5$  min, >95% purity.

### NMR spectra of rac3j

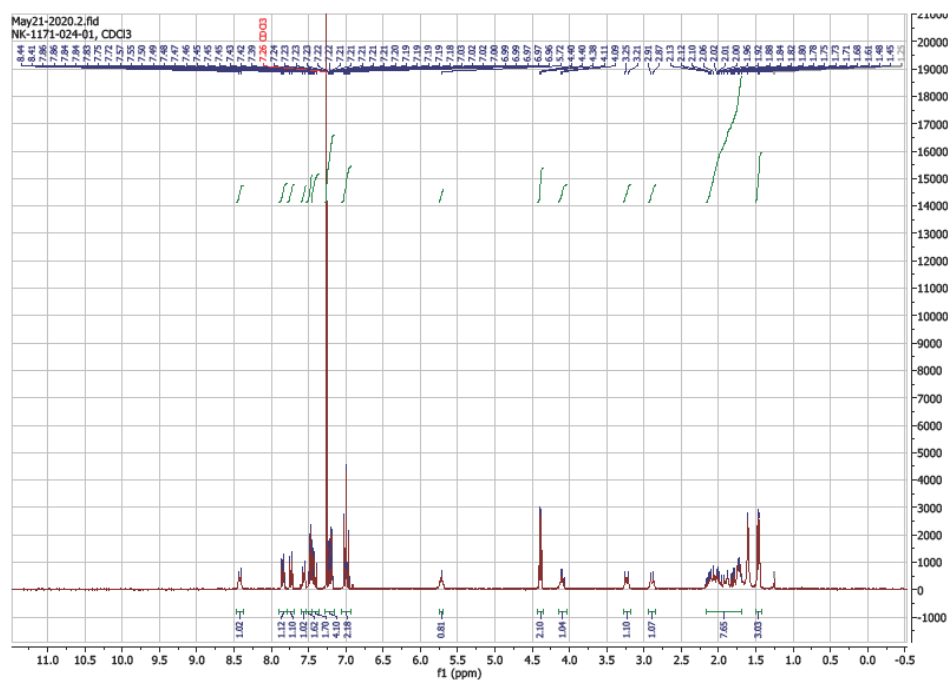

## N-((2-methoxypyridin-4-yl)methyl)-1-(1-(naphthalen-1-yl)ethyl)piperidine-4-carboxamide (rac5c)

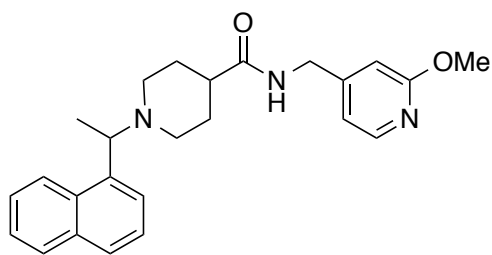

rac5c

The title compound **rac5c** was obtained as described for compound **rac3k** in 74% yield.  $^1\text{H}$  NMR (300 MHz,  $\text{CDCl}_3$ )  $\delta$  8.41 (br s, 1H), 8.08 (d,  $J = 5.3$  Hz, 1H), 7.90 – 7.81 (m, 1H), 7.75 (d,  $J = 8.2$  Hz, 1H), 7.58 (s, 1H), 7.54 – 7.38 (m, 3H), 6.77 – 6.69 (m, 1H), 6.58 (s, 1H), 5.84 (s, 1H), 4.39 (d,  $J = 6.0$  Hz, 2H), 4.15 (s, 1H), 3.91 (s, 3H), 3.31 – 3.21 (m, 1H), 2.98 – 2.88 (m, 1H), 2.22 – 1.71 (m, 7H), 1.55 – 1.43 (m, 3H). ES+ MS: ( $M + H$ ) 404.2. HPLC  $t_g = 1.2$  min, >95% purity.

### NMR spectra of rac5c

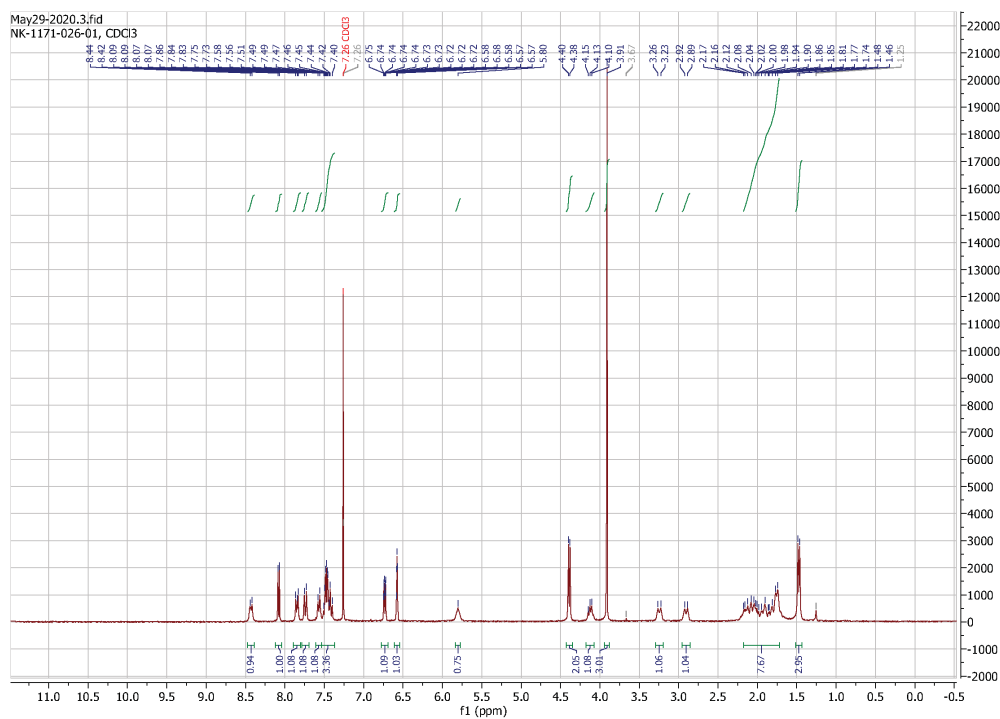

## Appendix Reference

Swatek KN, Aumayr M, Pruneda JN, Visser LJ, Berryman S, Kueck AF, Geurink PP, Ovaa H, van Kuppeveld FJM, Tuthill TJ, Skern T & Komander D (2018) Irreversible inactivation of ISG15 by a viral leader protease enables alternative infection detection strategies. *Proceedings of the National Academy of Sciences* **115**: 2371–2376
