# Supplementary material
Source: PubMed Central journal article supplement (PMC7507706)

Uncropped versions of SDS-PAGE gels

S1 site WT/Mts +  
K48 triUb kinetics  
comparison

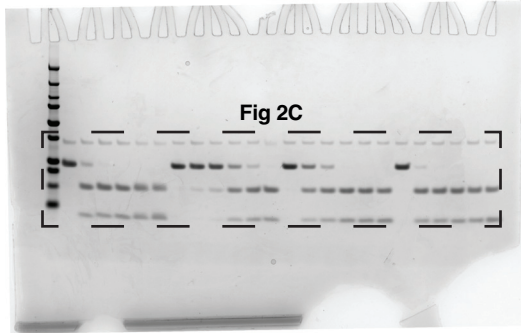

S1 site WT/Mts +  
proISG15 kinetics  
comparison

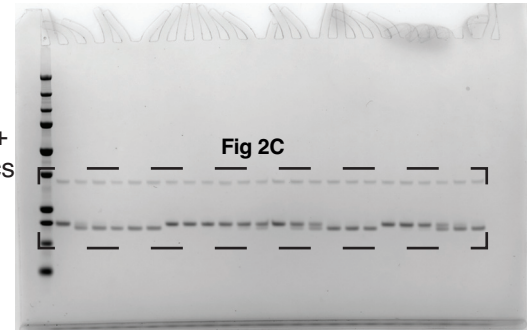

Supplement: EMBJ-39-e106275-s005.pdf [file EMBJ-39-e106275-s005.pdf]
