# Supplementary material
Source: PubMed Central journal article supplement (PMC7507706)

PLpro WT +  
K48 triUb  
kinetics assays

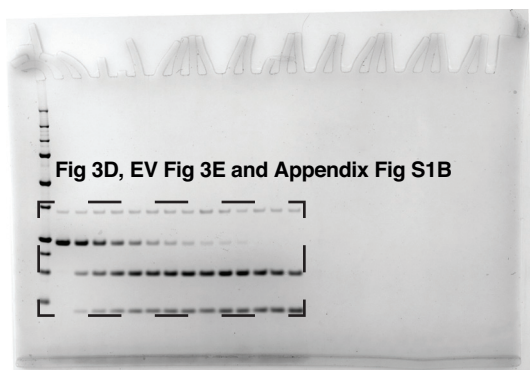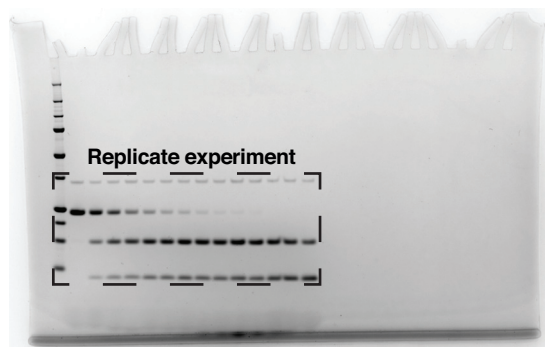

PLpro F69S +  
K48 triUb kinetics  
assays

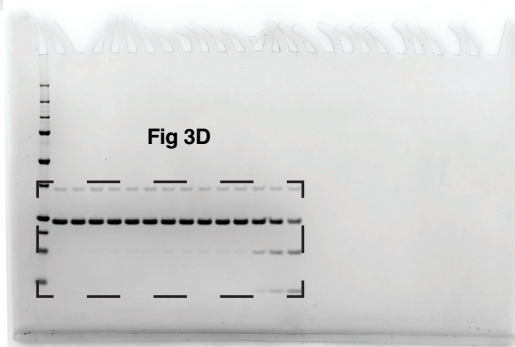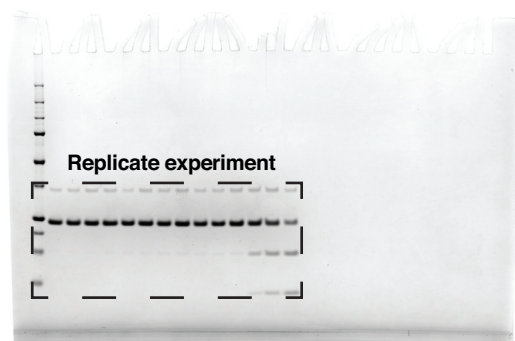

PLpro WT + ISG15<sup>CTD</sup>  
kinetics assays

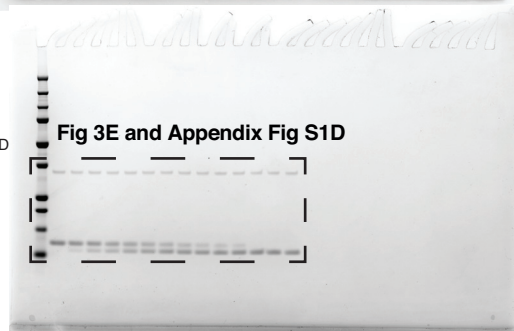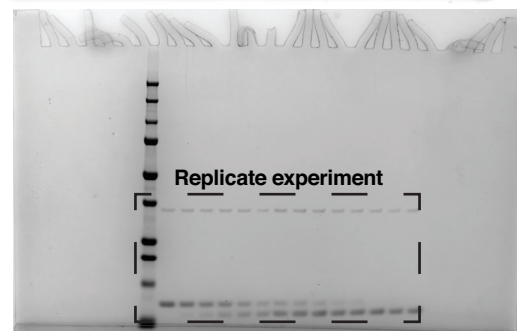

PLpro F69S +  
proISG15<sup>CTD</sup> kinetics  
assays

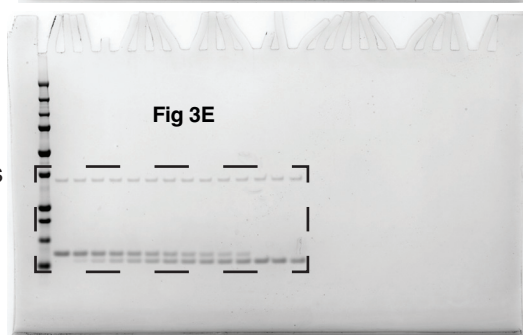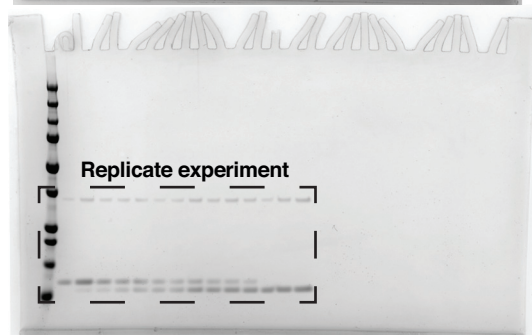

PLpro WT +  
proISG15  
kinetics  
assays

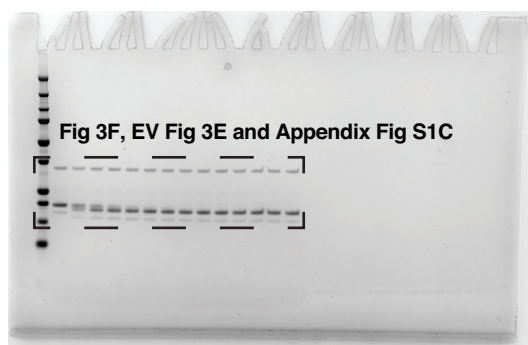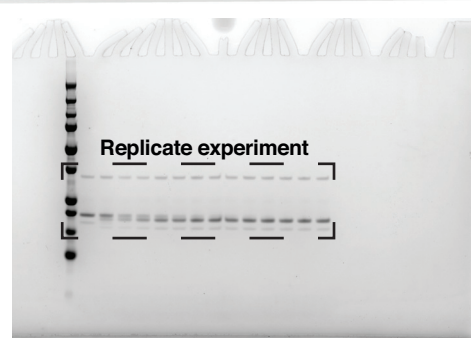

PLpro F69S +  
proISG15 kinetics  
assays

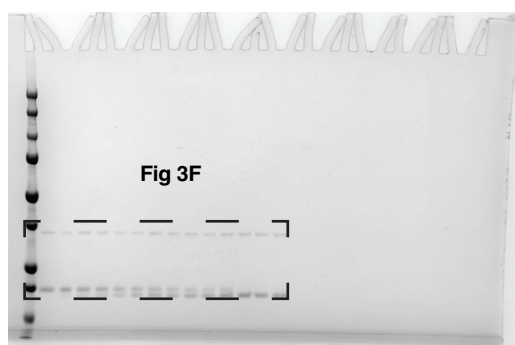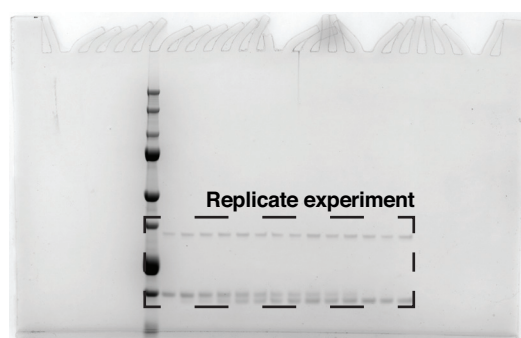

Supplement: EMBJ-39-e106275-s006.pdf [file EMBJ-39-e106275-s006.pdf]
