# Supplementary material
Source: PubMed Central journal article supplement (PMC7507706)

Uncropped versions of SDS-PAGE gels

PLpro WT Ub  
chain specificity  
assays

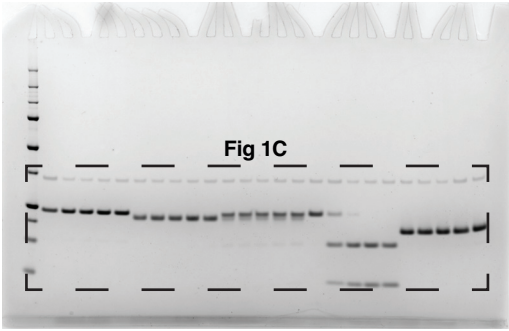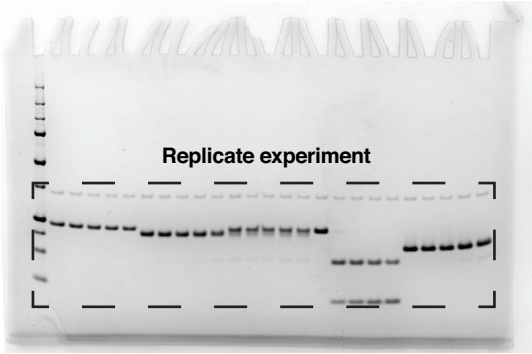

Supplement: EMBJ-39-e106275-s004.pdf [file EMBJ-39-e106275-s004.pdf]

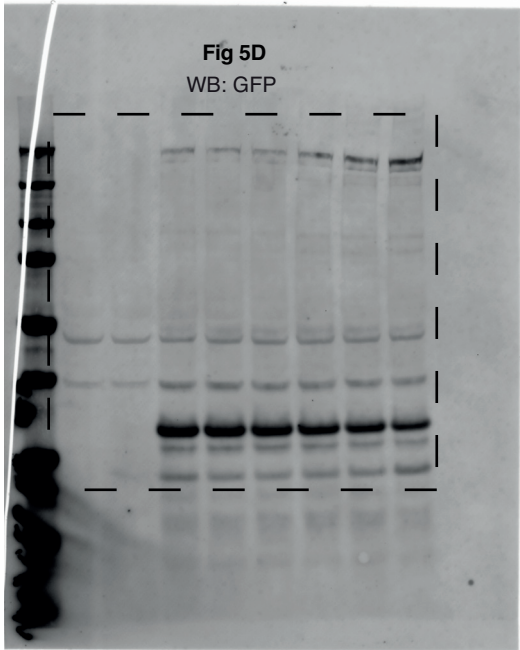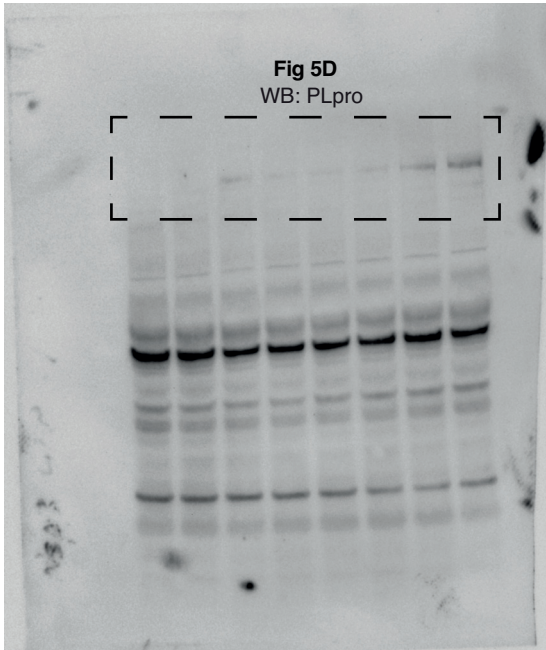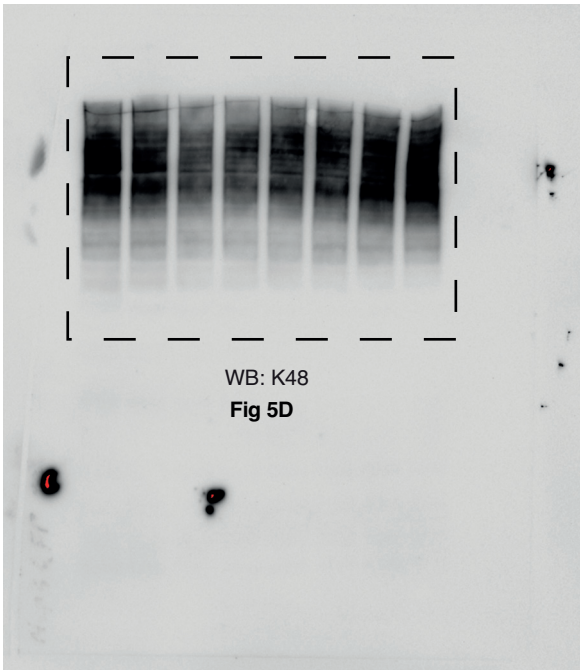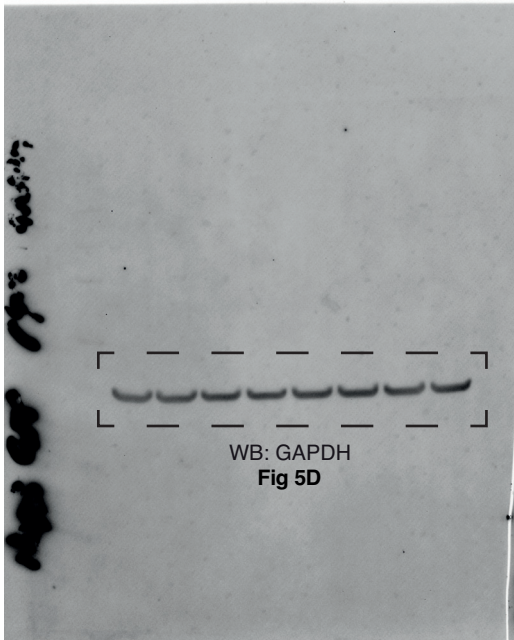

Supplement: EMBJ-39-e106275-s007.pdf [file EMBJ-39-e106275-s007.pdf]
